# Supplementary material for: Targeting the HuR Oncogenic Role with a New Class of Cytoplasmic Dimerization Inhibitors
Source: Oxford University Press journal article supplement (doi:10.1158/0008-5472.can-20-2858), 2021-02-18
Supplement: 00085472can202858-sup-249877_2_supp_6881928_qnpsbf.xlsx [file 00085472can202858-sup-249877_2_supp_6881928_qnpsbf.xlsx]

## Sheet: Summary
Kinase	IC50 for SRI-41664 (nM)	IC50 for SRI-42127 (nM)
TRKA	99.2	117
AAK1	29.6	120
IRAK1	300	319
PIM1	829	668
cMET	5980	>10,000
		`

## Sheet: 41664-TRKA-PIM1
Thermo Fisher Scientific's SelectScreen™ Profiling Service: 10-point Titration Results
		SelectScreen Scientist:	Joshua Campbell												SSBK-Z'-LYTE (Madison, WI USA)
		Quality Assurance Review:	David Bayer
% Phosphorylation		Pass
Z' Determination		Pass
Project #	Compound Name	Kinase Tested	[ATP] Tested	IC50	Hillslope	R2 Value	Conc of Compound	% Inhibition		Development Reaction Interference	Test Compound Interference		Z'	Kinase Part# / Lot#	Graph
			(μM)	(nM)			(nM)	Point 1	Point 2		Coumarin	Fluorescein
SSBK10799_45001	SRI-00041664-001	NTRK1 (TRKA)	Km app	99.2	0.6984	0.9956	30000	94.9547	97.0605	Pass	Pass	Pass	0.7689	PV3144/1931718
SSBK10799_45001	SRI-00041664-001	NTRK1 (TRKA)	Km app	99.2	0.6984	0.9956	10000	96.9609	93.7594	Pass	Pass	Pass	0.7689	PV3144/1931718
SSBK10799_45001	SRI-00041664-001	NTRK1 (TRKA)	Km app	99.2	0.6984	0.9956	3330	90.5887	92.9269	Pass	Pass	Pass	0.7689	PV3144/1931718
SSBK10799_45001	SRI-00041664-001	NTRK1 (TRKA)	Km app	99.2	0.6984	0.9956	1110	85.8713	85.1555	Pass	Pass	Pass	0.7689	PV3144/1931718
SSBK10799_45001	SRI-00041664-001	NTRK1 (TRKA)	Km app	99.2	0.6984	0.9956	370	68.6311	71.6095	Pass	Pass	Pass	0.7689	PV3144/1931718
SSBK10799_45001	SRI-00041664-001	NTRK1 (TRKA)	Km app	99.2	0.6984	0.9956	123	48.4747	42.3073	Pass	Pass	Pass	0.7689	PV3144/1931718
SSBK10799_45001	SRI-00041664-001	NTRK1 (TRKA)	Km app	99.2	0.6984	0.9956	41.2	30.3609	25.6486	Pass	Pass	Pass	0.7689	PV3144/1931718
SSBK10799_45001	SRI-00041664-001	NTRK1 (TRKA)	Km app	99.2	0.6984	0.9956	13.7	16.5806	15.9562	Pass	Pass	Pass	0.7689	PV3144/1931718
SSBK10799_45001	SRI-00041664-001	NTRK1 (TRKA)	Km app	99.2	0.6984	0.9956	4.57	3.9003	6.3546	Pass	Pass	Pass	0.7689	PV3144/1931718
SSBK10799_45001	SRI-00041664-001	NTRK1 (TRKA)	Km app	99.2	0.6984	0.9956	1.49	-23.9174	9.6327	Pass	Pass	Pass	0.7689	PV3144/1931718
SSBK10799_45001	SRI-00041664-001	PIM1	Km app	829	1.0126	0.9998	30000	96.9033	94.9002	Pass	Pass	Pass	0.885	PV3503/1354816
SSBK10799_45001	SRI-00041664-001	PIM1	Km app	829	1.0126	0.9998	10000	92.7753	92.0666	Pass	Pass	Pass	0.885	PV3503/1354816
SSBK10799_45001	SRI-00041664-001	PIM1	Km app	829	1.0126	0.9998	3330	80.7657	78.0521	Pass	Pass	Pass	0.885	PV3503/1354816
SSBK10799_45001	SRI-00041664-001	PIM1	Km app	829	1.0126	0.9998	1110	57.2449	53.2006	Pass	Pass	Pass	0.885	PV3503/1354816
SSBK10799_45001	SRI-00041664-001	PIM1	Km app	829	1.0126	0.9998	370	29.171	29.5902	Pass	Pass	Pass	0.885	PV3503/1354816
SSBK10799_45001	SRI-00041664-001	PIM1	Km app	829	1.0126	0.9998	123	8.6538	12.7446	Pass	Pass	Pass	0.885	PV3503/1354816
SSBK10799_45001	SRI-00041664-001	PIM1	Km app	829	1.0126	0.9998	41.2	1.5259	2.3342	Pass	Pass	Pass	0.885	PV3503/1354816
SSBK10799_45001	SRI-00041664-001	PIM1	Km app	829	1.0126	0.9998	13.7	-0.4565	-0.3639	Pass	Pass	Pass	0.885	PV3503/1354816
SSBK10799_45001	SRI-00041664-001	PIM1	Km app	829	1.0126	0.9998	4.57	-0.5491	-2.3337	Pass	Pass	Pass	0.885	PV3503/1354816
SSBK10799_45001	SRI-00041664-001	PIM1	Km app	829	1.0126	0.9998	1.49	-2.7501	-1.8096	Pass	Pass	Pass	0.885	PV3503/1354816

## Sheet: 42127-TRKA-PIM1
Thermo Fisher Scientific's SelectScreen™ Profiling Service: 10-point Titration Results
		SelectScreen Scientist:	Nathan Gullicksrud												SSBK-Z'-LYTE (Madison, WI USA)
		Quality Assurance Review:	Joshua Campbell
% Phosphorylation		Pass
Z' Determination		Pass
Project #	Compound Name	Kinase Tested	[ATP] Tested	IC50	Hillslope	R2 Value	Conc of Compound	% Inhibition		Development Reaction Interference	Test Compound Interference		Z'	Kinase Part# / Lot#	Graph
			(μM)	(nM)			(nM)	Point 1	Point 2		Coumarin	Fluorescein
SSBK10799_44415	SRI-00042127-002	NTRK1 (TRKA)	Km app	117	1.1549	0.9978	30000	87.3355	87.2161	Pass	Pass	Pass	0.7296	PV3144/1931718
SSBK10799_44415	SRI-00042127-002	NTRK1 (TRKA)	Km app	117	1.1549	0.9978	10000	91.5994	92.1307	Pass	Pass	Pass	0.7296	PV3144/1931718
SSBK10799_44415	SRI-00042127-002	NTRK1 (TRKA)	Km app	117	1.1549	0.9978	3330	89.2169	91.3939	Pass	Pass	Pass	0.7296	PV3144/1931718
SSBK10799_44415	SRI-00042127-002	NTRK1 (TRKA)	Km app	117	1.1549	0.9978	1110	83.8833	84.0326	Pass	Pass	Pass	0.7296	PV3144/1931718
SSBK10799_44415	SRI-00042127-002	NTRK1 (TRKA)	Km app	117	1.1549	0.9978	370	71.9787	68.9185	Pass	Pass	Pass	0.7296	PV3144/1931718
SSBK10799_44415	SRI-00042127-002	NTRK1 (TRKA)	Km app	117	1.1549	0.9978	123	48.1413	50.7885	Pass	Pass	Pass	0.7296	PV3144/1931718
SSBK10799_44415	SRI-00042127-002	NTRK1 (TRKA)	Km app	117	1.1549	0.9978	41.2	18.6768	29.977	Pass	Pass	Pass	0.7296	PV3144/1931718
SSBK10799_44415	SRI-00042127-002	NTRK1 (TRKA)	Km app	117	1.1549	0.9978	13.7	13.0238	3.7459	Pass	Pass	Pass	0.7296	PV3144/1931718
SSBK10799_44415	SRI-00042127-002	NTRK1 (TRKA)	Km app	117	1.1549	0.9978	4.57	5.0135	6.428	Pass	Pass	Pass	0.7296	PV3144/1931718
SSBK10799_44415	SRI-00042127-002	NTRK1 (TRKA)	Km app	117	1.1549	0.9978	1.49	6.85	5.1095	Pass	Pass	Pass	0.7296	PV3144/1931718
SSBK10799_44415	SRI-00042127-002	PIM1	Km app	668	1.1449	0.9997	30000	97.0369	97.7801	Pass	Pass	Pass	0.8938	PV3503/1354816
SSBK10799_44415	SRI-00042127-002	PIM1	Km app	668	1.1449	0.9997	10000	93.7945	97.5972	Pass	Pass	Pass	0.8938	PV3503/1354816
SSBK10799_44415	SRI-00042127-002	PIM1	Km app	668	1.1449	0.9997	3330	84.6558	114.157	Pass	Pass	Pass	0.8938	PV3503/1354816
SSBK10799_44415	SRI-00042127-002	PIM1	Km app	668	1.1449	0.9997	1110	66.3502	63.9096	Pass	Pass	Pass	0.8938	PV3503/1354816
SSBK10799_44415	SRI-00042127-002	PIM1	Km app	668	1.1449	0.9997	370	35.1257	34.9204	Pass	Pass	Pass	0.8938	PV3503/1354816
SSBK10799_44415	SRI-00042127-002	PIM1	Km app	668	1.1449	0.9997	123	12.9099	15.501	Pass	Pass	Pass	0.8938	PV3503/1354816
SSBK10799_44415	SRI-00042127-002	PIM1	Km app	668	1.1449	0.9997	41.2	7.2523	8.1295	Pass	Pass	Pass	0.8938	PV3503/1354816
SSBK10799_44415	SRI-00042127-002	PIM1	Km app	668	1.1449	0.9997	13.7	5.4791	1.0951	Pass	Pass	Pass	0.8938	PV3503/1354816
SSBK10799_44415	SRI-00042127-002	PIM1	Km app	668	1.1449	0.9997	4.57	2.3618	3.0543	Pass	Pass	Pass	0.8938	PV3503/1354816
SSBK10799_44415	SRI-00042127-002	PIM1	Km app	668	1.1449	0.9997	1.49	2.55	3.5466	Pass	Pass	Pass	0.8938	PV3503/1354816

## Sheet: 41664-AAK1
Thermo Fisher Scientific's SelectScreen™ Profiling Service: 10-point Titration Results
		SelectScreen Scientist:	Joshua Campbell										SSBK-LanthaScreen Binding (Madison, WI USA)
		Quality Assurance Review:	David Bayer
Z' Determination		Pass
Project #	Compound Name	Kinase Tested	IC50	Hillslope	R2 Value	Conc of Compound	% Displacement		Test Compound Interference		Z'	Kinase Part# / Lot#	Graph
			(nM)			(nM)	Point 1	Point 2	Donor	Acceptor
SSBK10799_45001	SRI-00041664-001	AAK1	29.6	0.5959	0.9973	30000	111.131	109.893	Pass	Pass	0.8848	A30967/1916782
SSBK10799_45001	SRI-00041664-001	AAK1	29.6	0.5959	0.9973	10000	104.875	104.85	Pass	Pass	0.8848	A30967/1916782
SSBK10799_45001	SRI-00041664-001	AAK1	29.6	0.5959	0.9973	3330	99.8256	98.2902	Pass	Pass	0.8848	A30967/1916782
SSBK10799_45001	SRI-00041664-001	AAK1	29.6	0.5959	0.9973	1110	96.2001	92.3401	Pass	Pass	0.8848	A30967/1916782
SSBK10799_45001	SRI-00041664-001	AAK1	29.6	0.5959	0.9973	370	88.1044	86.9943	Pass	Pass	0.8848	A30967/1916782
SSBK10799_45001	SRI-00041664-001	AAK1	29.6	0.5959	0.9973	123	71.6286	73.8073	Pass	Pass	0.8848	A30967/1916782
SSBK10799_45001	SRI-00041664-001	AAK1	29.6	0.5959	0.9973	41.2	56.4095	52.69	Pass	Pass	0.8848	A30967/1916782
SSBK10799_45001	SRI-00041664-001	AAK1	29.6	0.5959	0.9973	13.7	31.1929	32.9392	Pass	Pass	0.8848	A30967/1916782
SSBK10799_45001	SRI-00041664-001	AAK1	29.6	0.5959	0.9973	4.57	14.7988	11.6763	Pass	Pass	0.8848	A30967/1916782
SSBK10799_45001	SRI-00041664-001	AAK1	29.6	0.5959	0.9973	1.50	3.9776	4.872	Pass	Pass	0.8848	A30967/1916782

## Sheet: 42127-AAK1
Thermo Fisher Scientific's SelectScreen™ Profiling Service: 10-point Titration Results
		SelectScreen Scientist:	Nathan Gullicksrud										SSBK-LanthaScreen Binding (Madison, WI USA)
		Quality Assurance Review:	Aaron Bergsma
Z' Determination		Pass
Project #	Compound Name	Kinase Tested	IC50	Hillslope	R2 Value	Conc of Compound	% Displacement		Test Compound Interference		Z'	Kinase Part# / Lot#	Graph
			(nM)			(nM)	Point 1	Point 2	Donor	Acceptor
SSBK10799_44415	SRI-00042127-002	AAK1	120	0.7724	0.9985	30000	22.5841	61.8787	Pass	Pass	0.8088	A30967/1916782
SSBK10799_44415	SRI-00042127-002	AAK1	120	0.7724	0.9985	10000	103.511	101.821	Pass	Pass	0.8088	A30967/1916782
SSBK10799_44415	SRI-00042127-002	AAK1	120	0.7724	0.9985	3330	92.0282	94.9865	Pass	Pass	0.8088	A30967/1916782
SSBK10799_44415	SRI-00042127-002	AAK1	120	0.7724	0.9985	1110	85.281	89.6688	Pass	Pass	0.8088	A30967/1916782
SSBK10799_44415	SRI-00042127-002	AAK1	120	0.7724	0.9985	370	75.1261	72.145	Pass	Pass	0.8088	A30967/1916782
SSBK10799_44415	SRI-00042127-002	AAK1	120	0.7724	0.9985	123	48.5327	57.4854	Pass	Pass	0.8088	A30967/1916782
SSBK10799_44415	SRI-00042127-002	AAK1	120	0.7724	0.9985	41.2	27.8086	31.8661	Pass	Pass	0.8088	A30967/1916782
SSBK10799_44415	SRI-00042127-002	AAK1	120	0.7724	0.9985	13.7	15.2517	17.6359	Pass	Pass	0.8088	A30967/1916782
SSBK10799_44415	SRI-00042127-002	AAK1	120	0.7724	0.9985	4.57	5.7169	6.1103	Pass	Pass	0.8088	A30967/1916782
SSBK10799_44415	SRI-00042127-002	AAK1	120	0.7724	0.9985	1.50	3.7972	3.3429	Pass	Pass	0.8088	A30967/1916782

## Sheet: 41664-42127-IRAK1
Thermo Fisher Scientific's SelectScreen™ Profiling Service: 10-point Titration Results
		SelectScreen Scientist:	Aaron Bergsma											SSBK-Adapta (Madison, WI USA)
		Quality Assurance Review:	Joshua Campbell
% Conversion		Pass
Z' Determination		Pass
Project #	Compound Name	Kinase Tested	[ATP] Tested	IC50	Hillslope	R2 Value	Conc of Compound	% Inhibition		Test Compound Interference		Z'	Kinase Part# / Lot#	Graph
			(μM)	(nM)			(nM)	Point 1	Point 2	Donor	Acceptor
SSBK10799_45109	SRI-00041664-001	IRAK1	Km app	300	1.1017	0.9994	30000	100	99.3364	Pass	Pass	0.9035	PV4403/2005323
SSBK10799_45109	SRI-00041664-001	IRAK1	Km app	300	1.1017	0.9994	10000	99.1795	99.1896	Pass	Pass	0.9035	PV4403/2005323
SSBK10799_45109	SRI-00041664-001	IRAK1	Km app	300	1.1017	0.9994	3330	95.0148	94.0608	Pass	Pass	0.9035	PV4403/2005323
SSBK10799_45109	SRI-00041664-001	IRAK1	Km app	300	1.1017	0.9994	1110	82.3815	82.7821	Pass	Pass	0.9035	PV4403/2005323
SSBK10799_45109	SRI-00041664-001	IRAK1	Km app	300	1.1017	0.9994	370	59.2653	61.5116	Pass	Pass	0.9035	PV4403/2005323
SSBK10799_45109	SRI-00041664-001	IRAK1	Km app	300	1.1017	0.9994	123	33.4538	29.4254	Pass	Pass	0.9035	PV4403/2005323
SSBK10799_45109	SRI-00041664-001	IRAK1	Km app	300	1.1017	0.9994	41.2	16.6682	21.1063	Pass	Pass	0.9035	PV4403/2005323
SSBK10799_45109	SRI-00041664-001	IRAK1	Km app	300	1.1017	0.9994	13.7	16.8818	5.2092	Pass	Pass	0.9035	PV4403/2005323
SSBK10799_45109	SRI-00041664-001	IRAK1	Km app	300	1.1017	0.9994	4.57	8.4581	6.8191	Pass	Pass	0.9035	PV4403/2005323
SSBK10799_45109	SRI-00041664-001	IRAK1	Km app	300	1.1017	0.9994	1.49	7.0917	9.319	Pass	Pass	0.9035	PV4403/2005323
SSBK10799_45109	SRI-00042127-002	IRAK1	Km app	319	1.072	0.9996	30000	97.8458	98.793	Pass	Pass	0.9035	PV4403/2005323
SSBK10799_45109	SRI-00042127-002	IRAK1	Km app	319	1.072	0.9996	10000	97.6007	97.1529	Pass	Pass	0.9035	PV4403/2005323
SSBK10799_45109	SRI-00042127-002	IRAK1	Km app	319	1.072	0.9996	3330	92.828	91.8916	Pass	Pass	0.9035	PV4403/2005323
SSBK10799_45109	SRI-00042127-002	IRAK1	Km app	319	1.072	0.9996	1110	78.3297	79.4782	Pass	Pass	0.9035	PV4403/2005323
SSBK10799_45109	SRI-00042127-002	IRAK1	Km app	319	1.072	0.9996	370	60.2668	56.7753	Pass	Pass	0.9035	PV4403/2005323
SSBK10799_45109	SRI-00042127-002	IRAK1	Km app	319	1.072	0.9996	123	33.6535	28.5978	Pass	Pass	0.9035	PV4403/2005323
SSBK10799_45109	SRI-00042127-002	IRAK1	Km app	319	1.072	0.9996	41.2	17.5314	15.5017	Pass	Pass	0.9035	PV4403/2005323
SSBK10799_45109	SRI-00042127-002	IRAK1	Km app	319	1.072	0.9996	13.7	16.4902	5.874	Pass	Pass	0.9035	PV4403/2005323
SSBK10799_45109	SRI-00042127-002	IRAK1	Km app	319	1.072	0.9996	4.57	13.275	5.7931	Pass	Pass	0.9035	PV4403/2005323
SSBK10799_45109	SRI-00042127-002	IRAK1	Km app	319	1.072	0.9996	1.49	4.7626	9.764	Pass	Pass	0.9035	PV4403/2005323

## Sheet: 41664-42127-cMET
Thermo Fisher Scientific's SelectScreen™ Profiling Service: 10-point Titration Results
		SelectScreen Scientist:	Joshua Campbell				Date:								SSBK-Z'-LYTE (Madison, WI USA)
		Quality Assurance Review:	David Bayer				Date:
% Phosphorylation		Pass
Z' Determination		Pass
Project #	Compound Name	Kinase Tested	[ATP] Tested	IC50	Hillslope	R2 Value	Conc of Compound	% Inhibition		Development Reaction Interference	Test Compound Interference		Z'	Kinase Part# / Lot#	Graph
			(μM)	(nM)			(nM)	Point 1	Point 2		Coumarin	Fluorescein
SSBK10799_45109	SRI-00041664-001	MET (cMet)	Km app	5980	0.9382	0.9869	30000	64.7226	65.8866	Pass	Pass	Pass	0.6909	PV3143/722459
SSBK10799_45109	SRI-00041664-001	MET (cMet)	Km app	5980	0.9382	0.9869	10000	49.5211	51.6533	Pass	Pass	Pass	0.6909	PV3143/722459
SSBK10799_45109	SRI-00041664-001	MET (cMet)	Km app	5980	0.9382	0.9869	3330	31.6218	32.6755	Pass	Pass	Pass	0.6909	PV3143/722459
SSBK10799_45109	SRI-00041664-001	MET (cMet)	Km app	5980	0.9382	0.9869	1110	-5.0156	11.6938	Pass	Pass	Pass	0.6909	PV3143/722459
SSBK10799_45109	SRI-00041664-001	MET (cMet)	Km app	5980	0.9382	0.9869	370	10.6092	12.9786	Pass	Pass	Pass	0.6909	PV3143/722459
SSBK10799_45109	SRI-00041664-001	MET (cMet)	Km app	5980	0.9382	0.9869	123	5.9571	4.8248	Pass	Pass	Pass	0.6909	PV3143/722459
SSBK10799_45109	SRI-00041664-001	MET (cMet)	Km app	5980	0.9382	0.9869	41.2	6.4002	-29.792	Pass	Pass	Pass	0.6909	PV3143/722459
SSBK10799_45109	SRI-00041664-001	MET (cMet)	Km app	5980	0.9382	0.9869	13.7	0.461	8.5564	Pass	Pass	Pass	0.6909	PV3143/722459
SSBK10799_45109	SRI-00041664-001	MET (cMet)	Km app	5980	0.9382	0.9869	4.57	-1.5564	-0.3081	Pass	Pass	Pass	0.6909	PV3143/722459
SSBK10799_45109	SRI-00041664-001	MET (cMet)	Km app	5980	0.9382	0.9869	1.49	-0.1252	2.8449	Pass	Pass	Pass	0.6909	PV3143/722459
SSBK10799_45109	SRI-00042127-002	MET (cMet)	Km app	>10000	0.3579	0.8187	30000	-18.6511	-15.8466	Flag	Pass	Pass	0.7598	PV3143/722459
SSBK10799_45109	SRI-00042127-002	MET (cMet)	Km app	>10000	0.3579	0.8187	10000	14.9427	17.4406	Pass	Pass	Pass	0.7598	PV3143/722459
SSBK10799_45109	SRI-00042127-002	MET (cMet)	Km app	>10000	0.3579	0.8187	3330	16.8348	14.3151	Pass	Pass	Pass	0.7598	PV3143/722459
SSBK10799_45109	SRI-00042127-002	MET (cMet)	Km app	>10000	0.3579	0.8187	1110	17.9204	8.0933	Pass	Pass	Pass	0.7598	PV3143/722459
SSBK10799_45109	SRI-00042127-002	MET (cMet)	Km app	>10000	0.3579	0.8187	370	7.5612	-2.8733	Pass	Pass	Pass	0.7598	PV3143/722459
SSBK10799_45109	SRI-00042127-002	MET (cMet)	Km app	>10000	0.3579	0.8187	123	-5.872	-5.8997	Pass	Pass	Pass	0.7598	PV3143/722459
SSBK10799_45109	SRI-00042127-002	MET (cMet)	Km app	>10000	0.3579	0.8187	41.2	-7.9377	-3.3178	Pass	Pass	Pass	0.7598	PV3143/722459
SSBK10799_45109	SRI-00042127-002	MET (cMet)	Km app	>10000	0.3579	0.8187	13.7	-1.676	-14.6196	Pass	Pass	Pass	0.7598	PV3143/722459
SSBK10799_45109	SRI-00042127-002	MET (cMet)	Km app	>10000	0.3579	0.8187	4.57	-1.7122	-2.8205	Pass	Pass	Pass	0.7598	PV3143/722459
SSBK10799_45109	SRI-00042127-002	MET (cMet)	Km app	>10000	0.3579	0.8187	1.49	0.2439	-4.3061	Pass	Pass	Pass	0.7598	PV3143/722459
