# Supplementary material for: Targeting the HuR Oncogenic Role with a New Class of Cytoplasmic Dimerization Inhibitors
Source: Oxford University Press journal article supplement (doi:10.1158/0008-5472.can-20-2858), 2021-02-18
Supplement: 00085472can202858-sup-249877_2_supp_6881929_qnpxbf.xls [file 00085472can202858-sup-249877_2_supp_6881929_qnpxbf.xls]

## Sheet: Report Cover
In vivo PK Study Report
Title: Pharmacokinetics of SRI 42127 Following a Single IP Administration to C57 bl/6 mice
				Study Info
Study Protocol #:	PH-DMPK-UAB-19-001				Date Compound Received:	1/15/2019
Requested by:	UAB				Date In-Life Initiated:	1/16/2019
Team Name:	PK-BA				Date Reported:	1/21/2019
Project:					Analysts:	Longfei Shi
											`
				Compound Info
Compound #:	SRI 42127				Compound MW:	348.41
Batch ID:	NA				Batch FW:	348.41
Salt:	No				Correction Factor:	1
				In-life
Study Type:	IP PK				Species/strain:	C57 bl/6 mice
N / Treatment:	3				Sex:	Male
Doses:	IP	10	mg/kg		Study Director:	Li Deng
Formulations:	IP	10/%DMSO and 90% HP-β-CD (20% w/v) in Water
Dosing Solutions:	IP	2	mg/mL
Blood&Brain Sampling @	IP	0.167 h ,0.5h and 1h
In-life Scientists:	Zheng Dong, Chengchneg Zhnag, Jingwei Sun,Yuqi Zhang, Xue Zhou, Ming Xia
In-life Comments:	No abnormal clinical symptoms were observed during the entire experiment.
				Bioanalysis
Bioanalytical Assay:	HPLC	Instrument: Prominence Degasser DGU-20A5R(C), Serial NO. L20705414138 IX; Liquid Chromatograph LC-30AD, Serial NO. L20555408197 AE and L20555408195 AE; Communications Bus Module CBM-20A, Serial NO. L20235429486 CD; Auto Sampler SIL-30AC, Serial NO.L20565403814 AE; Rack changer II: L20585400900 SS
	MS	AB Sciex Triple Quad 5500 LC/MS/MS instrument (Serial NO. BB214861610)
	Column	Waters XSELECT HSS T3 2.5µm 2.1×50mm
	Mobile Phase	A	5% Acetonitrile in Water (0.1%Formic acid)
		B	95% Acetonitrile in Water (0.1%Formic acid)
	Quantification	Internal Standard Method
Bioanalysis Notebook #:	A04935
Bioanalysts:	Longfei Shi
Bioanalysis Comments:

## Sheet: PK_Results
SRI 42127 IP Pharmacokinetic Profile in Male C57 bl/6 mice
SRI 42127 IP Plasma concentration-time data								SRI 42127 IP Brain concentration-time data
Data highlighted in blue were used for T1/2 caculation								Data highlighted in blue were used for T1/2 caculation
IP Dose	10	mg/kg						Dose	10	mg/kg
Time	Concentration (ng/mL)			Mean	SD	CV		Time	Concentration (ng/mL)			Concentration (ng/g)			Mean	SD	CV
(h)	Group 1	Group 2	Group 3	(ng/mL)	(ng/mL)	(%)		(h)	Group 1	Group 2	Group 3	Group 1	Group 2	Group 3	(ng/g)	(ng/g)	(%)
0.167	2910	3450	4010	3456.67	550.03	15.9122		0.167	244	275	304	1220	1375	1520	1371.67	150.028	10.9376
0.5	782	1430	870	1027.33	351.484	34.2133		0.5	83.9	109	78.1	419.5	545	390.5	451.667	82.1193	18.1814
1	130	104	53.9	95.9667	38.6808	40.3065		1	10.6	8.77	3.93	53	43.85	19.65	38.8333	17.2317	44.3734
LLOQ for STD samples: 1 ng/mL								LLOQ for STD samples: 0.5 ng/mL
								All of the brain samples were added with PBS by brain weight (g) to PBS volume (mL) ratio 1:4 for homogenating.
								The actual concentration (ng/g) is the detected value (ng/mL) multiplied by 5.
Summary of SRI 42127 pharmacokinetic parameters								Summary of SRI 42127 pharmacokinetic parameters
IP Dose	10	mg/kg						IP Dose	10	mg/kg
PK parameters		Unit	IP					PK parameters		Unit	IP
T1/2		h	0.159824					T1/2		h	0.160068
Tmax		h	0.167					Tmax		h	0.167
Cmax		ng/mL	3457					Cmax		ng/g	1372
AUClast		h*ng/mL	1316					AUClast		h*ng/g	540.958
AUCInf		h*ng/mL	1338.13					AUCInf		h*ng/g	549.918
AUC_%Extrap_obs		%	1.6542					AUC_%Extrap_obs		%	1.62935
MRTInf_obs		h	0.30598					MRTInf_obs		h	0.313027
AUClast/D		h*mg/mL	131.6					AUClast/D		h*mg/g	54.0958
F		%	NA					F		%	NA
Plasma concentration vs time profile for SRI 42127 after 10 mg/kg IP in C57 bl/6 mice								Brain concentration vs time profile for SRI 42127 after 10 mg/kg IP in C57 bl/6 mice
Ratio of SRI 42127 between Plasma and Brain Following IP Administration
Route	Time (h)	Animal ID	Brain (ng/g)	Plasma (ng/mL)	Ratio (Plasma/ Brain)	Mean		Route	Time (h)	Animal ID	Brain (ng/g)	Plasma (ng/mL)	Ratio (Brain/ Plasma)	Mean
IP	0.167	1	1220	2910	2.38525	2.51083		IP	0.167	1	1220	2910	0.419244	0.398949
		2	1375	3450	2.50909					2	1375	3450	0.398551
		3	1520	4010	2.63816					3	1520	4010	0.379052
	0.5	4	419.5	782	1.86412	2.23863			0.5	4	419.5	782	0.536445	0.455471
		5	545	1430	2.62385					5	545	1430	0.381119
		6	390.5	870	2.22791					6	390.5	870	0.448851
	1	7	53	130	2.45283	2.52252			1	7	53	130	0.407692	0.397964
		8	43.85	104	2.37172					8	43.85	104	0.421635
		9	19.65	53.9	2.743					9	19.65	53.9	0.364564
Plasma concentration vs time profile for Longfei Shi after in								Plasma concentration vs time profile for after in

## Sheet: Formulation
Compound information
Compound ID	SRI 42127	Lot No.:	NA
MW (Free form)	348.41	FW (Salt form)	348.41
Purity	NA	Appearance	Sight Yellow powder
Formulation Preparation
Preparation of IP (10 mg/kg, 5 mL/kg) formulation
Dissolved 4.84 mg of SRI 42127 in 0.242 mL of DMSO with vortexing, sonification, then addded 2.178 mL "HPβCD (20% w/v) in Water" with vortexing, sonification to obtain a solution at 2 mg/mL of SRI 42127.
Note: The formulation was freshly made prior to use.
Formulation Checklist
Formulation: PO dosing of SRI 42127
Process:	no manipulation			sonicate
	heat (high)			add EtOH
	dilute			heat (low)
	vortex	√		filtered
	add acid / base			heat (med)
	preformulated			centrifuge/supernatant
	other _vehicle ingredients: No
Result:	clear/OK	√		ppt’d out
	particulate			color	Colorless
	suspension			emulsion
	cloudy			other
	homogeneous
Dose Formulaitons Validation
Route	Sample Name	Dilution Factor	Nominal	Measured	Mean	Accuracy	SD	CV
			(mg/mL)	(mg/mL)	(mg/mL)	(%)	(mg/mL)	(%)
IP	IP_Dose_1	10000	2	1.85	1.92667	96.3333	0.100167	5.19895
	IP_Dose_2	10000		2.04
	IP_Dose_3	10000		1.89

## Sheet: Analytical Method
LC-MS/MS System
HPLC:	Instrument: Prominence Degasser DGU-20A5R(C), Serial NO. L20705414138 IX; Liquid Chromatograph LC-30AD, Serial NO. L20555408197 AE and L20555408195 AE; Communications Bus Module CBM-20A, Serial NO. L20235429486 CD; Auto Sampler SIL-30AC, Serial NO.L20565403814 AE; Rack changer II: L20585400900 SS
Column:	Waters XSELECT HSS T3 2.5µm 2.1×50mm
MS	AB Sciex Triple Quad 5500 LC/MS/MS instrument (Serial NO. BB214861610)
HPLC Conditions
Mobile Phase
Solution A:	5% Acetonitrile in Water (0.1%Formic acid)
Solution B:	95% Acetonitrile in Water (0.1%Formic acid)
Gradient
Flow rate: 0.6 mL/min
Time (min)	A (%)	B (%)
0.2	95	5
1.7	5	95
2	5	95
2.01	95	5
2.5	95	5
Injection volume:	5 μL
Sample Preparation
The desired serial concentrations of working solutions were achieved by diluting stock solution of analyte with 50% acetonitrile in water solution. 3 µL of working solutions ( 5, 10, 20, 50, 100, 500, 1000, 5000, 10000 ng/mL) were added to 30 μL of the blank C57 bl/6 mice plasma or brain homogenate to achieve calibration standards of 0.5~1000 ng/mL ( 0.5, 1, 2, 5, 10, 50, 100, 500, 1000 ng/mL) in…

## Sheet: Raw Data
Plasma
Peak Name: Dexamethasone
Use as Internal Standard
Q1/Q3 Masses: 393.40/373.30 Da
Peak Name: SRI42127
Internal Standard: Dexamethasone
Q1/Q3 Masses: 349.07/265.10 Da
Fit	Linear	Weighting	1 / (x * x)	Iterate	No
Intercept	0.00879
Slope	0.0225
Correlation coefficient	0.9967
Use Area
Sample Name	Sample ID	Filetype	Filename	Dil.Factor	R.T.	Area	IS Area	Conc.	Calc.Conc.	Accuracy	Use Record
DB	1	Double Blank	UAB-19-001 Mouse IP Plasma PK_190116.wiff	1	0	0	0	0	N/A	N/A
CB	2	Blank	UAB-19-001 Mouse IP Plasma PK_190116.wiff	1	1.15	176	41700	0	N/A	N/A
C1_1	3	Standard	UAB-19-001 Mouse IP Plasma PK_190116.wiff	1	1.17	473	43600	0.5	0.0913	18.3	0
C2_1	4	Standard	UAB-19-001 Mouse IP Plasma PK_190116.wiff	1	1.17	1250	42000	1	0.934	93.4	1
C3_1	5	Standard	UAB-19-001 Mouse IP Plasma PK_190116.wiff	1	1.17	1990	41400	2	1.74	87.2	1
C4_1	6	Standard	UAB-19-001 Mouse IP Plasma PK_190116.wiff	1	1.17	4940	44000	5	4.59	91.8	1
C5_1	7	Standard	UAB-19-001 Mouse IP Plasma PK_190116.wiff	1	1.17	10700	42200	10	10.8	108	1
C6_1	8	Standard	UAB-19-001 Mouse IP Plasma PK_190116.wiff	1	1.17	53700	44100	50	53.7	107	1
C7_1	9	Standard	UAB-19-001 Mouse IP Plasma PK_190116.wiff	1	1.16	96800	42000	100	102	102	1
C8_1	10	Standard	UAB-19-001 Mouse IP Plasma PK_190116.wiff	1	1.17	514000	42900	500	532	106	1
C9_1	11	Standard	UAB-19-001 Mouse IP Plasma PK_190116.wiff	1	1.17	995000	42800	1000	1030	103	1
CB	12	Blank	UAB-19-001 Mouse IP Plasma PK_190116.wiff	1	1.17	1030	44100	0	N/A	N/A
QC_A_1	13	Quality Control	UAB-19-001 Mouse IP Plasma PK_190116.wiff	1	1.16	1430	42700	1	1.09	109	1
QC_B_1	14	Quality Control	UAB-19-001 Mouse IP Plasma PK_190116.wiff	1	1.16	2450	43000	2	2.14	107	1
QC_C_1	15	Quality Control	UAB-19-001 Mouse IP Plasma PK_190116.wiff	1	1.17	50900	45400	50	49.4	98.8	1
QC_D_1	16	Quality Control	UAB-19-001 Mouse IP Plasma PK_190116.wiff	1	1.16	808000	45000	800	797	99.6	1
CB	17	Blank	UAB-19-001 Mouse IP Plasma PK_190116.wiff	1	1.16	499	44400	0	N/A	N/A
IP_Dose_1	18	Unknown	UAB-19-001 Mouse IP Plasma PK_190116.wiff	1	1.17	184000	43900	N/A	185	N/A
IP_Dose_2	19	Unknown	UAB-19-001 Mouse IP Plasma PK_190116.wiff	1	1.16	201000	43600	N/A	204	N/A
IP_Dose_3	20	Unknown	UAB-19-001 Mouse IP Plasma PK_190116.wiff	1	1.16	182000	42700	N/A	189	N/A
CB	21	Blank	UAB-19-001 Mouse IP Plasma PK_190116.wiff	1	1.17	308	44800	0	N/A	N/A
IP_M1_1h	22	Unknown	UAB-19-001 Mouse IP Plasma PK_190116.wiff	10	1.17	13300	44100	N/A	130	N/A
IP_M2_1h	23	Unknown	UAB-19-001 Mouse IP Plasma PK_190116.wiff	10	1.16	11100	45900	N/A	104	N/A
IP_M3_1h	24	Unknown	UAB-19-001 Mouse IP Plasma PK_190116.wiff	10	1.16	5650	43400	N/A	53.9	N/A
IP_M1_0.5h	25	Unknown	UAB-19-001 Mouse IP Plasma PK_190116.wiff	10	1.17	82900	46900	N/A	782	N/A
IP_M2_0.5h	26	Unknown	UAB-19-001 Mouse IP Plasma PK_190116.wiff	10	1.17	138000	42600	N/A	1430	N/A
IP_M3_0.5h	27	Unknown	UAB-19-001 Mouse IP Plasma PK_190116.wiff	10	1.17	89400	45400	N/A	870	N/A
IP_M1_0.167h	28	Unknown	UAB-19-001 Mouse IP Plasma PK_190116.wiff	10	1.17	291000	44400	N/A	2910	N/A
IP_M2_0.167h	29	Unknown	UAB-19-001 Mouse IP Plasma PK_190116.wiff	10	1.17	321000	41300	N/A	3450	N/A
IP_M3_0.167h	30	Unknown	UAB-19-001 Mouse IP Plasma PK_190116.wiff	10	1.17	397000	44000	N/A	4010	N/A
CB	31	Blank	UAB-19-001 Mouse IP Plasma PK_190116.wiff	1	1.16	544	46700	N/A	0.127	N/A
QC_A_2	32	Quality Control	UAB-19-001 Mouse IP Plasma PK_190116.wiff	1	1.17	1510	43000	1	1.17	117	1
QC_B_2	33	Quality Control	UAB-19-001 Mouse IP Plasma PK_190116.wiff	1	1.17	2660	44600	2	2.26	113	1
QC_C_2	34	Quality Control	UAB-19-001 Mouse IP Plasma PK_190116.wiff	1	1.17	49900	47600	50	46.1	92.2	1
QC_D_2	35	Quality Control	UAB-19-001 Mouse IP Plasma PK_190116.wiff	1	1.16	842000	43800	800	853	107	1
CB	36	Blank	UAB-19-001 Mouse IP Plasma PK_190116.wiff	1	1.16	657	44900	0	N/A	N/A
C1_2	37	Standard	UAB-19-001 Mouse IP Plasma PK_190116.wiff	1	1.16	1200	48900	0.5	0.696	139	0
C2_2	38	Standard	UAB-19-001 Mouse IP Plasma PK_190116.wiff	1	1.16	1560	45400	1	1.13	113	1
C3_2	39	Standard	UAB-19-001 Mouse IP Plasma PK_190116.wiff	1	1.16	1880	46500	2	1.4	70.2	0
C4_2	40	Standard	UAB-19-001 Mouse IP Plasma PK_190116.wiff	1	1.16	5750	45900	5	5.18	104	1
C5_2	41	Standard	UAB-19-001 Mouse IP Plasma PK_190116.wiff	1	1.17	10300	45800	10	9.61	96.1	1
C6_2	42	Standard	UAB-19-001 Mouse IP Plasma PK_190116.wiff	1	1.17	55600	49600	50	49.4	98.8	1
C7_2	43	Standard	UAB-19-001 Mouse IP Plasma PK_190116.wiff	1	1.16	101000	45600	100	97.5	97.5	1
C8_2	44	Standard	UAB-19-001 Mouse IP Plasma PK_190116.wiff	1	1.16	522000	49500	500	468	93.6	1
C9_2	45	Standard	UAB-19-001 Mouse IP Plasma PK_190116.wiff	1	1.17	1060000	48300	1000	971	97.1	1
Brain
Peak Name: Dexamethasone
Use as Internal Standard
Q1/Q3 Masses: 393.40/373.30 Da
Peak Name: SRI42127
Internal Standard: Dexamethasone
Q1/Q3 Masses: 349.07/265.10 Da
Fit	Linear	Weighting	1 / (x * x)	Iterate	No
Intercept	0.00755
Slope	0.0208
Correlation coefficient	0.9971
Use Area
Sample Name	Sample ID	Filetype	Filename	Dil.Factor	R.T.	Area	IS Area	Conc.	Calc.Conc.	Accuracy	Use Record
DB	1	Double Blank	UAB-19-001 Mouse IP Brain PK_190116.wiff	1	1.17	331	96.4	0	N/A	N/A
CB	2	Blank	UAB-19-001 Mouse IP Brain PK_190116.wiff	1	1.17	210	46800	0	N/A	N/A
C1_1	3	Standard	UAB-19-001 Mouse IP Brain PK_190116.wiff	1	1.17	828	45900	0.5	0.504	101	1
C2_1	4	Standard	UAB-19-001 Mouse IP Brain PK_190116.wiff	1	1.17	1170	48700	1	0.788	78.8	0
C3_1	5	Standard	UAB-19-001 Mouse IP Brain PK_190116.wiff	1	1.16	2520	56700	2	1.77	88.4	1
C4_1	6	Standard	UAB-19-001 Mouse IP Brain PK_190116.wiff	1	1.17	5520	49500	5	4.99	99.8	1
C5_1	7	Standard	UAB-19-001 Mouse IP Brain PK_190116.wiff	1	1.17	10100	53600	10	8.72	87.2	1
C6_1	8	Standard	UAB-19-001 Mouse IP Brain PK_190116.wiff	1	1.17	51200	45100	50	54.1	108	1
C7_1	9	Standard	UAB-19-001 Mouse IP Brain PK_190116.wiff	1	1.17	101000	47300	100	102	102	1
C8_1	10	Standard	UAB-19-001 Mouse IP Brain PK_190116.wiff	1	1.17	523000	46500	500	540	108	1
C9_1	11	Standard	UAB-19-001 Mouse IP Brain PK_190116.wiff	1	1.17	974000	49100	1000	952	95.2	1
CB	12	Blank	UAB-19-001 Mouse IP Brain PK_190116.wiff	1	1.17	923	49800	0	N/A	N/A
QC_A_1	13	Quality Control	UAB-19-001 Mouse IP Brain PK_190116.wiff	1	1.17	1630	45200	1	1.37	137	0
QC_B_1	14	Quality Control	UAB-19-001 Mouse IP Brain PK_190116.wiff	1	1.17	2320	46000	2	2.06	103	1
QC_C_1	15	Quality Control	UAB-19-001 Mouse IP Brain PK_190116.wiff	1	1.17	53500	44200	50	57.7	115	1
QC_D_1	16	Quality Control	UAB-19-001 Mouse IP Brain PK_190116.wiff	1	1.16	833000	47000	800	851	106	1
CB	17	Blank	UAB-19-001 Mouse IP Brain PK_190116.wiff	1	1.17	505	47100	0	N/A	N/A
IP_M1_1h	18	Unknown	UAB-19-001 Mouse IP Brain PK_190116.wiff	1	1.17	10800	47200	N/A	10.6	N/A
IP_M2_1h	19	Unknown	UAB-19-001 Mouse IP Brain PK_190116.wiff	1	1.16	8760	46000	N/A	8.77	N/A
IP_M3_1h	20	Unknown	UAB-19-001 Mouse IP Brain PK_190116.wiff	1	1.16	4440	49600	N/A	3.93	N/A
IP_M1_0.5h	21	Unknown	UAB-19-001 Mouse IP Brain PK_190116.wiff	1	1.17	84400	48100	N/A	83.9	N/A
IP_M2_0.5h	22	Unknown	UAB-19-001 Mouse IP Brain PK_190116.wiff	1	1.17	102000	45000	N/A	109	N/A
IP_M3_0.5h	23	Unknown	UAB-19-001 Mouse IP Brain PK_190116.wiff	1	1.17	80800	49400	N/A	78.1	N/A
IP_M1_0.167h	24	Unknown	UAB-19-001 Mouse IP Brain PK_190116.wiff	1	1.17	237000	46600	N/A	244	N/A
IP_M2_0.167h	25	Unknown	UAB-19-001 Mouse IP Brain PK_190116.wiff	1	1.17	287000	49900	N/A	275	N/A
IP_M3_0.167h	26	Unknown	UAB-19-001 Mouse IP Brain PK_190116.wiff	1	1.16	299000	47200	N/A	304	N/A
CB	27	Blank	UAB-19-001 Mouse IP Brain PK_190116.wiff	1	1.16	371	51500	N/A	< 0	N/A
QC_A_2	28	Quality Control	UAB-19-001 Mouse IP Brain PK_190116.wiff	1	1.17	1640	50400	1	1.2	120	1
QC_B_2	29	Quality Control	UAB-19-001 Mouse IP Brain PK_190116.wiff	1	1.17	2420	47500	2	2.09	104	1
QC_C_2	30	Quality Control	UAB-19-001 Mouse IP Brain PK_190116.wiff	1	1.16	54300	48600	50	53.3	107	1
QC_D_2	31	Quality Control	UAB-19-001 Mouse IP Brain PK_190116.wiff	1	1.16	820000	51700	800	760	95	1
CB	32	Blank	UAB-19-001 Mouse IP Brain PK_190116.wiff	1	1.17	682	49200	0	N/A	N/A
C1_2	33	Standard	UAB-19-001 Mouse IP Brain PK_190116.wiff	1	1.16	856	48000	0.5	0.493	98.6	0
C2_2	34	Standard	UAB-19-001 Mouse IP Brain PK_190116.wiff	1	1.17	1430	49000	1	1.04	104	1
C3_2	35	Standard	UAB-19-001 Mouse IP Brain PK_190116.wiff	1	1.16	2460	47500	2	2.12	106	1
C4_2	36	Standard	UAB-19-001 Mouse IP Brain PK_190116.wiff	1	1.17	5010	49700	5	4.48	89.5	1
C5_2	37	Standard	UAB-19-001 Mouse IP Brain PK_190116.wiff	1	1.17	10800	48000	10	10.5	105	1
C6_2	38	Standard	UAB-19-001 Mouse IP Brain PK_190116.wiff	1	1.17	53400	47600	50	53.4	107	1
C7_2	39	Standard	UAB-19-001 Mouse IP Brain PK_190116.wiff	1	1.17	103000	47400	100	104	104	1
C8_2	40	Standard	UAB-19-001 Mouse IP Brain PK_190116.wiff	1	1.16	516000	50200	500	493	98.6	1
C9_2	41	Standard	UAB-19-001 Mouse IP Brain PK_190116.wiff	1	1.17	1040000	51000	1000	975	97.5	1

## Sheet: Parameters 
Plasma					Brain
project	Time of Dose	Dose (mg/kg)			project	Time of Dose	Dose (mg/kg)
1	0	10			2	0	10
subject	Parameter	Units	IP		subject	Parameter	Units	IP
1	Rsq		0.995256		2	Rsq		0.990194
1	Rsq_adjusted		0.990512		2	Rsq_adjusted		0.980387
1	Corr_XY		-0.997625		2	Corr_XY		-0.995085
1	No_points_lambda_z		3		2	No_points_lambda_z		3
1	Lambda_z	1/h	4.33695		2	Lambda_z	1/h	4.33032
1	Lambda_z_lower	h	0.167		2	Lambda_z_lower	h	0.167
1	Lambda_z_upper	h	1		2	Lambda_z_upper	h	1
1	HL_Lambda_z	h	0.159824		2	HL_Lambda_z	h	0.160068
1	Tlag	h	0		2	Tlag	h	0
1	Tmax	h	0.167		2	Tmax	h	0.167
1	Cmax	ng/ml	3457		2	Cmax	ng/g	1372
1	Cmax_D	kg*ng/ml/mg	345.7		2	Cmax_D	kg*ng/g/mg	137.2
1	Tlast	h	1		2	Tlast	h	1
1	Clast	ng/ml	96		2	Clast	ng/g	38.8
1	AUClast	h*ng/ml	1316		2	AUClast	h*ng/g	540.958
1	AUCall	h*ng/ml	1316		2	AUCall	h*ng/g	540.958
1	AUCINF_obs	h*ng/ml	1338.13		2	AUCINF_obs	h*ng/g	549.918
1	AUCINF_D_obs	h*kg*ng/ml/mg	133.813		2	AUCINF_D_obs	h*kg*ng/g/mg	54.9918
1	AUC_%Extrap_obs	%	1.6542		2	AUC_%Extrap_obs	%	1.62935
1	Vz_F_obs	ml/kg	1723.13		2	Vz_F_obs	g/kg	4199.35
1	Cl_F_obs	ml/h/kg	7473.11		2	Cl_F_obs	g/h/kg	18184.5
1	AUCINF_pred	h*ng/ml	1339.44		2	AUCINF_pred	h*ng/g	550.692
1	AUCINF_D_pred	h*kg*ng/ml/mg	133.944		2	AUCINF_D_pred	h*kg*ng/g/mg	55.0692
1	AUC_%Extrap_pred	%	1.75051		2	AUC_%Extrap_pred	%	1.7676
1	Vz_F_pred	ml/kg	1721.44		2	Vz_F_pred	g/kg	4193.45
1	Cl_F_pred	ml/h/kg	7465.79		2	Cl_F_pred	g/h/kg	18159
1	AUMClast	h*h*ng/ml	382.202		2	AUMClast	h*h*ng/g	161.11
1	AUMCINF_obs	h*h*ng/ml	409.442		2	AUMCINF_obs	h*h*ng/g	172.139
1	AUMC_%Extrap_obs	%	6.65278		2	AUMC_%Extrap_obs	%	6.40716
1	AUMCINF_pred	h*h*ng/ml	411.056		2	AUMCINF_pred	h*h*ng/g	173.092
1	AUMC_%Extrap_pred	%	7.01934		2	AUMC_%Extrap_pred	%	6.9223
1	MRTlast	h	0.290428		2	MRTlast	h	0.297823
1	MRTINF_obs	h	0.30598		2	MRTINF_obs	h	0.313027
1	MRTINF_pred	h	0.306886		2	MRTINF_pred	h	0.314317
